# Supplementary material for: Autophagy compensates for defects in mitochondrial dynamics
Source: PLoS Genet. 2020 Mar 19;16(3):e1008638. doi: 10.1371/journal.pgen.1008638 (PMC7135339; doi:10.1371/journal.pgen.1008638)
Supplement: S1 Table — Candidate genes were identified in the primary RNAi-screen using fzo-1(tm1133), subsequently knocked-down and tested for induction of autophagy and re-screened for UPRmt suppression in two different mutant backgrounds: drp-1(tm1108) and spg-7(ad2249). (XLSX) [file pgen.1008638.s010.xlsx]

## Sheet: S1 Table
S1 Table	List of RNAi knockdowns that induce autophagy in wild-type animals and have been
	initially identified to suppress fzo-1(tm1133)-induced UPRmt.
Category	Sequence	Gene name	Human ortholog	fzo-1(lf)	drp-1(lf)	spg-7(lf)
Cell Architecture	K07C5.1	arx-2	ACTR2
	D2024.6	cap-1	CAPZA1,2
	M106.5	cap-2	CAPZB
	C53A5.6	C53A5.6	IPP
	C17H12.1	dyci-1	DYNC1I1,2
Cell Signaling	W03H9.4	cacn-1	CACTIN
	H25P06.2	cdk-9	CDK9
	C24H11.7	gbf-1*	GBF1
	T01G9.6	kin-10*	CSNK2B
	C27H6.2	ruvb-1*	RUVBL1
Cellular Trafficking	C06G3.10	cogc-2*	COG2
	Y51H7C.6	cogc-4*	COG4
	F23F1.5	F23F1.5	SNUPN
	F38A1.8	F38A1.8	SRPRA
	F32E10.4	ima-3	KPNA3,4
	C53D5.6	imb-3	IPO5, RANBP6
	Y59E9AL.7	nbet-1	BET1
	Y77E11A.13	npp-20	SEC13
	H15N14.2	nsf-1*	NSF
	R186.3	R186.3	SRPRB
	F20G4.1	smgl-1*	NBAS
	F55C5.8	srpa-68	SRP68
	T10H9.3	syx-18	STX18
	Y63D3A.5	tfg-1	TFG
	Y34D9A.10	vps-4*	VPS4A,B
	Y65B4A.3	vps-20*	CHMP6
	CD4.4	vps-37*	VPS37B,C
	Y48G1A.5	xpo-2/imb-5	CSE1L
Chromatin Structure	ZK1251.1	htas-1	H2AFY, H2AFY2
	F26F12.7	let-418	CHD4
	F55A3.3	spt-16	SUPT16H
Metabolism	C33H5.18	cdgs-1	CDS2
	C06E4.6	C06E4.6	HSD17B14
	F25B4.6	hmgs-1	HMGCS1,2
	H37A05.1	lpin-1	LPIN1,2,3
	W09B6.1	pod-2	ACACB
	C47E12.4	pyp-1	PPA1,2
PTM	T17E9.2	nmt-1	NMT1,2
	W02A11.4	uba-2	UBA2
Proteostasis	T21B10.7	cct-2	CCT2
	C04A2.7	dnj-5	DNAJC14
	C56C10.8	icd-1	BTF3,L4
	F21C3.5	pfd-6	PFDN6
	F54C9.2	stc-1	HSPA13
	F19B6.2	ufd-1*	UFD1L
RNA Processing	B0511.6	B0511.6	DDX18
	C14A4.4	crn-3	EXOSC10
	C55B7.8	dbr-1	DBR1
	F42H10.7	ess-2	ESS2
	F59C6.4	exos-3	EXOSC3
	F10B5.8	F10B5.8	INTS11
	C17E4.5	pabp-2	PABPN1
	C06E1.10	rha-2	DHX37
	C47E12.7	rrp-1	RRP1B, RRP1
	Y116A8C.32	sfa-1	SF1
	T28D9.10	snr-3	SNRPD1
	Y49E10.15	snr-6	SNRPE
	K02F2.3	teg-4	SF3B3
	W04A4.5	W04A4.5	INTS4
Transcription	B0261.1	B0261.1	BDP1
	F10E9.4	F10E9.4	TWISTNB
	C48E7.2	let-611	POLR3C
	Y113G7B.18	mdt-17	MED17
	F28F8.5	mdt-28	MED28
	F58A4.9	rpac-19	POLR1D
	H43I07.2	rpac-40	POLR1C
	C42D4.8	rpc-1	POLR3A
	F09F7.3	rpc-2	POLR3B
	ZK856.10	rpc-25	POLR3H
	R119.6	taf-4	TAF4B, TAF4
	F30F8.8	taf-5	TAF5
	ZK1320.12	taf-8	TAF8
	K03B4.3	taf-10	TAF10
	Y50D7A.2	xpd-1	ERCC2
Miscellaneous	W07B3.2	gei-4	n.a.
	Y46G5A.6	phi-3	n.a.
	ZK637.8	unc-32	ATP6V0A1,4
Uncharacterized	C23G10.8	C23G10.8	n.a.
	K02E2.7	K02E2.7	n.a.
	K10G6.5	K10G6.5	n.a.
	K10H10.4	K10H10.4	n.a.
	Y82E9BR.13	pals-17	n.a.
Ribosome Biogenesis	E02H1.1	E02H1.1	DIMT1
	T01C3.7	fib-1	FBLL1
	K12H4.3	K12H4.3	BRIX1
	R13A5.12	lpd-7	PES1
	T07A9.9	nog-1*	GTPBP4
	R151.3	rpl-6	RPL6
	F53G12.10	rpl-7	RPL7
	Y24D9A.4	rpl-7A	RPL7A
	JC8.3	rpl-12	RPL12
	C04F12.4	rpl-14	RPL14
	Y45F10D.12	rpl-18	RPL18
	E04A4.8	rpl-20	RPL18A
	C14B9.7	rpl-21	RPL21
	C27A2.2	rpl-22	RPL22
	B0336.10	rpl-23	RPL23
	F28C6.7	rpl-26	RPL26
	C53H9.1	rpl-27	RPL27
	W09C5.6	rpl-31	RPL31
	ZK652.4	rpl-35	RPL35
	B0393.1	rps-0	RPSA
	C23G10.3	rps-3	RPS3
	Y71A12B.1	rps-6	RPS6
	F40F11.1	rps-11	RPS11
	Y41D4B.5	rps-28	RPS28
	F10G7.1	tag-151	TSR1
Translation	F17C11.9	eef-1G	EEF1G
	H06H21.3	eif-1.A	EIF1AX,Y
	F11A3.2	eif-2Bδ	EIF2B4
	D2085.3	eif-2Bε	EIF2B5
	Y54E2A.11	eif-3.B	EIF3B
	B0511.10	eif-3.E	EIF3E
	H19N07.1	erfa-3	GSPT1,2
	F28H1.3	aars-2	AARS
	T08B2.9	fars-1	FARSA
	T10F2.1	gars-1	GARS
	T11G6.1	hars-1*	HARS, HARS2
	R11A8.6	iars-1*	IARS
	F22D6.3	nars-1	NARS
	Y41E3.4	qars-1	QARS
	F26F4.10	rars-1*	RARS
	C47D12.6	tars-1*	TARS, TARS2,2L
	Y80D3A.1	wars-1	WARS
	R08D7.4	R08D7.4	EEF2KMT, FAM86B1,2
	Y65B4A.6	Y65B4A.6	EIF4A3
* Genes that are already implemented in Fig 4A
				from the strongest to no GFP suppression
Candidate genes were screened for UPRmt suppression three times in technical duplicates with the same reporter (zcIs13)
in two different mutant backgrounds: drp-1(tm1108) and spg-7(ad2249). Fluorescence intensity was scored and classified
from very strong suppression to weak suppression (gradual violet coloring) or no suppression (white).
PTM: Post-translational modification.
